# Supplementary material for: Molybdenum-doped Co3S4 nanoarrays as outstanding catalysts for overall water splitting
Source: Royal Society of Chemistry journal article supplement (doi:10.1039/d3ce01132a), 2024-01-01
Supplement: d3ce01132a1.pdf [file d3ce01132a1.pdf]

# Molybdenum-doped $\text{Co}_3\text{S}_4$ nanoarrays as outstanding catalyst for overall water splitting

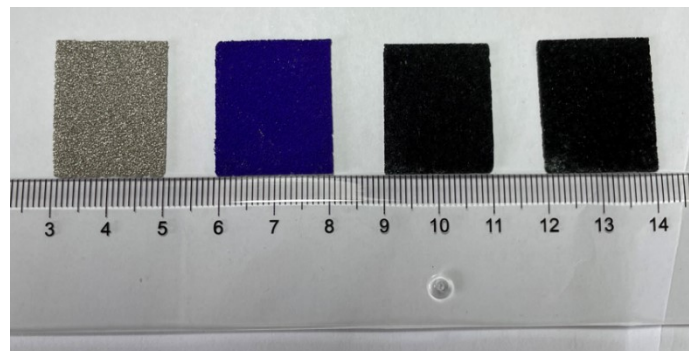

**Fig. S1** The photograph of bare NF, Co-MOF/NF,  $\text{Co}_3\text{S}_4/\text{NF}$ , and Mo- $\text{Co}_3\text{S}_4$ -0.1/NF.

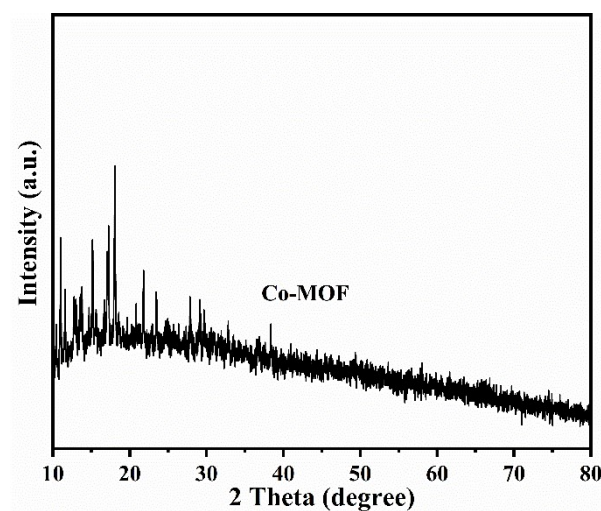

**Fig. S2** XRD pattern of Co-MOF.

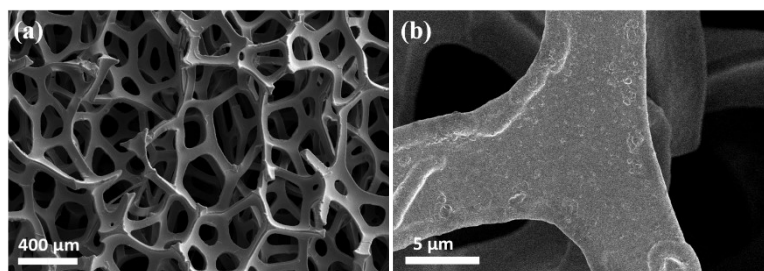

**Fig. S3** SEM image of (a, b) bare NF.

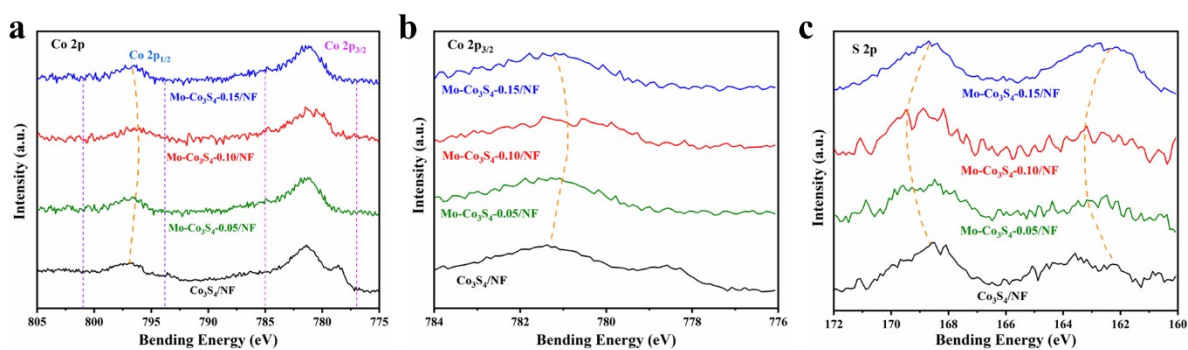

**Fig. S4** High resolution of XPS spectra of Mo-Co<sub>3</sub>S<sub>4</sub>-X/NF: (a)Co2p, (b)Co2p<sub>3/2</sub>, (c)S2p.

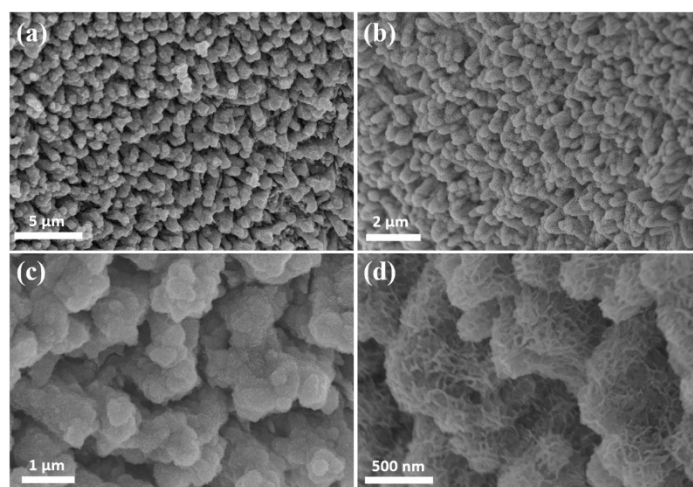

**Fig. S5** SEM image of (a,c) Mo-Co<sub>3</sub>S<sub>4</sub>-0.05/NF and (b,d) Mo-Co<sub>3</sub>S<sub>4</sub>-0.15/NF.

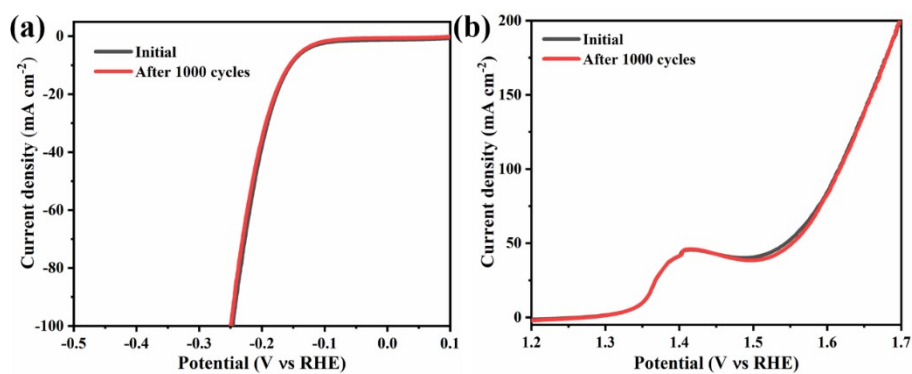

**Fig. S6** LSV of the Mo-Co<sub>3</sub>S<sub>4</sub>-0.1/NF before and after 1000 CV cycles (a) HER and (b) OER.

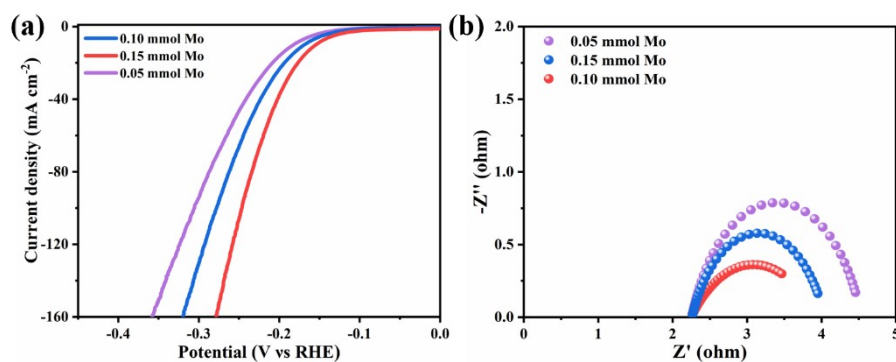

**Fig. S7** The LSV curves of HER performance for the Mo-Co<sub>3</sub>S<sub>4</sub>-0.05/NF, Mo-Co<sub>3</sub>S<sub>4</sub>-0.10/NF and Mo-Co<sub>3</sub>S<sub>4</sub>-0.15/NF. (b) The Nyquist plots of the Mo-Co<sub>3</sub>S<sub>4</sub>-0.05/NF, Mo-Co<sub>3</sub>S<sub>4</sub>-0.10/NF and Mo-Co<sub>3</sub>S<sub>4</sub>-0.15/NF.

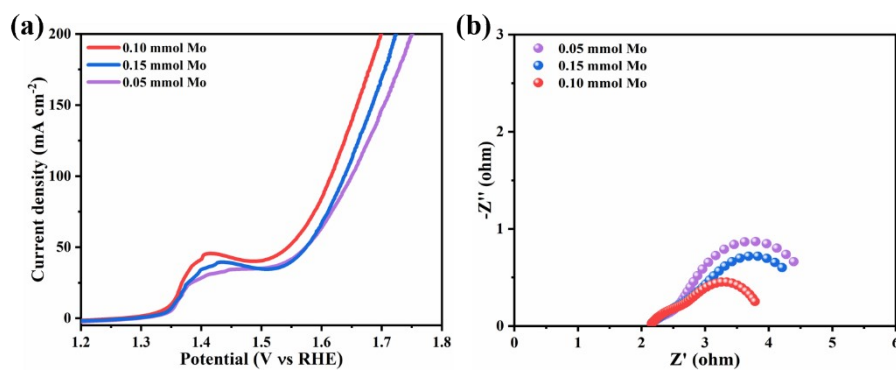

**Fig. S8** The LSV curves of OER performance for the Mo-Co<sub>3</sub>S<sub>4</sub>-0.05/NF, Mo-Co<sub>3</sub>S<sub>4</sub>-0.10/NF and Mo-Co<sub>3</sub>S<sub>4</sub>-0.15/NF. (b) The Nyquist plots of the Mo-Co<sub>3</sub>S<sub>4</sub>-0.05/NF, Mo-Co<sub>3</sub>S<sub>4</sub>-0.10/NF and Mo-Co<sub>3</sub>S<sub>4</sub>-0.15/NF measured in 1.0 M KOH.

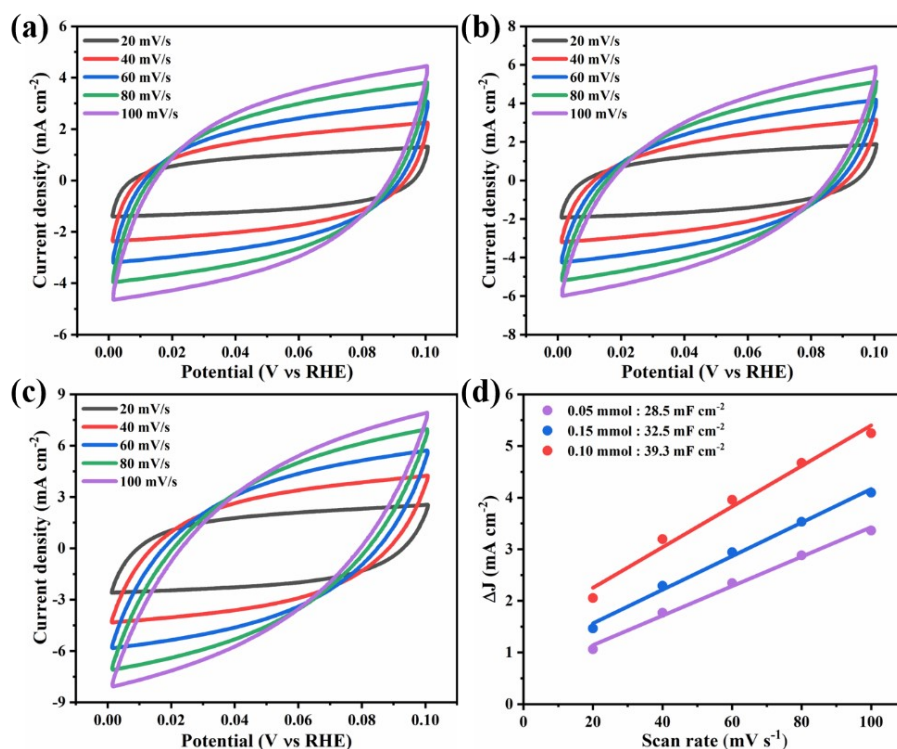

**Fig. S9** Cyclic voltammetry curves at different scan rates under for (a) Mo-Co<sub>3</sub>S<sub>4</sub>-0.05/NF, (b) Mo-Co<sub>3</sub>S<sub>4</sub>-0.15/NF and (c) Mo-Co<sub>3</sub>S<sub>4</sub>-0.10/NF under overpotential from 0 to 0.1 V vs. RHE. (d) the  $C_{dl}$  values calculated from current densities vs scan rates.

| Table S1. ICP-OES data of Mo-Co <sub>3</sub> S <sub>4</sub> -0.1/NF.Samples | Sample element content (wt %) |      |       |
|-----------------------------------------------------------------------------|-------------------------------|------|-------|
|                                                                             | Co                            | Mo   | S     |
| Mo-Co <sub>3</sub> S <sub>4</sub> -0.1/NF                                   | 29.34                         | 3.75 | 32.47 |
|                                                                             | 29.39                         | 3.73 | 32.60 |

**Table S2.** ICP-OES data of Mo-Co<sub>3</sub>S<sub>4</sub>-0.1/NF after HER test.

| Samples                                   | Sample element content (wt %) |      |       |
|-------------------------------------------|-------------------------------|------|-------|
|                                           | Co                            | Mo   | S     |
| Mo-Co <sub>3</sub> S <sub>4</sub> -0.1/NF | 29.06                         | 3.15 | 30.49 |
|                                           | 29.08                         | 3.13 | 30.57 |

**Table S3.** ICP-OES data of Mo-Co<sub>3</sub>S<sub>4</sub>-0.1/NF after OER test.

| Samples                                   | Sample element content (wt %) |      |       |
|-------------------------------------------|-------------------------------|------|-------|
|                                           | Co                            | Mo   | S     |
| Mo-Co <sub>3</sub> S <sub>4</sub> -0.1/NF | 29.15                         | 2.53 | 14.15 |
|                                           | 29.17                         | 2.49 | 14.33 |

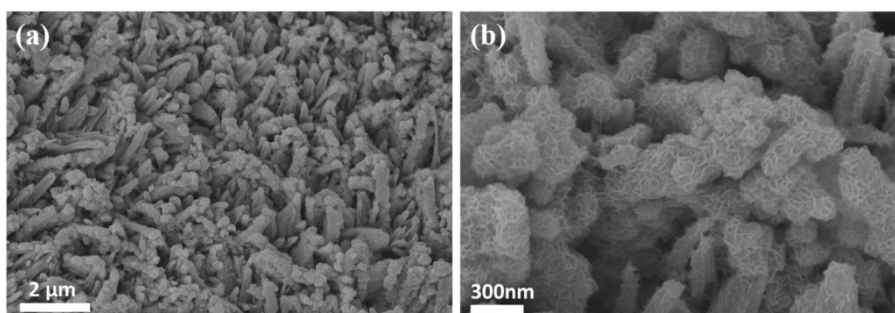

**Figure.S10** SEM image of Mo-Co<sub>3</sub>S<sub>4</sub>-0.1/NF after long-time test for HER.

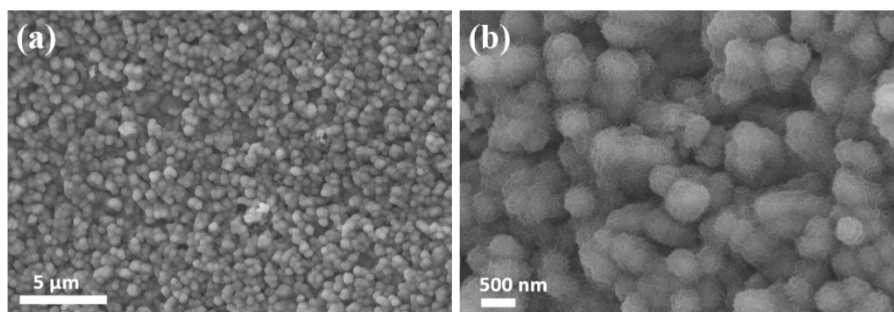

**Figure.S11** SEM image of Mo-Co<sub>3</sub>S<sub>4</sub>-0.1/NF after long-time test for OER.

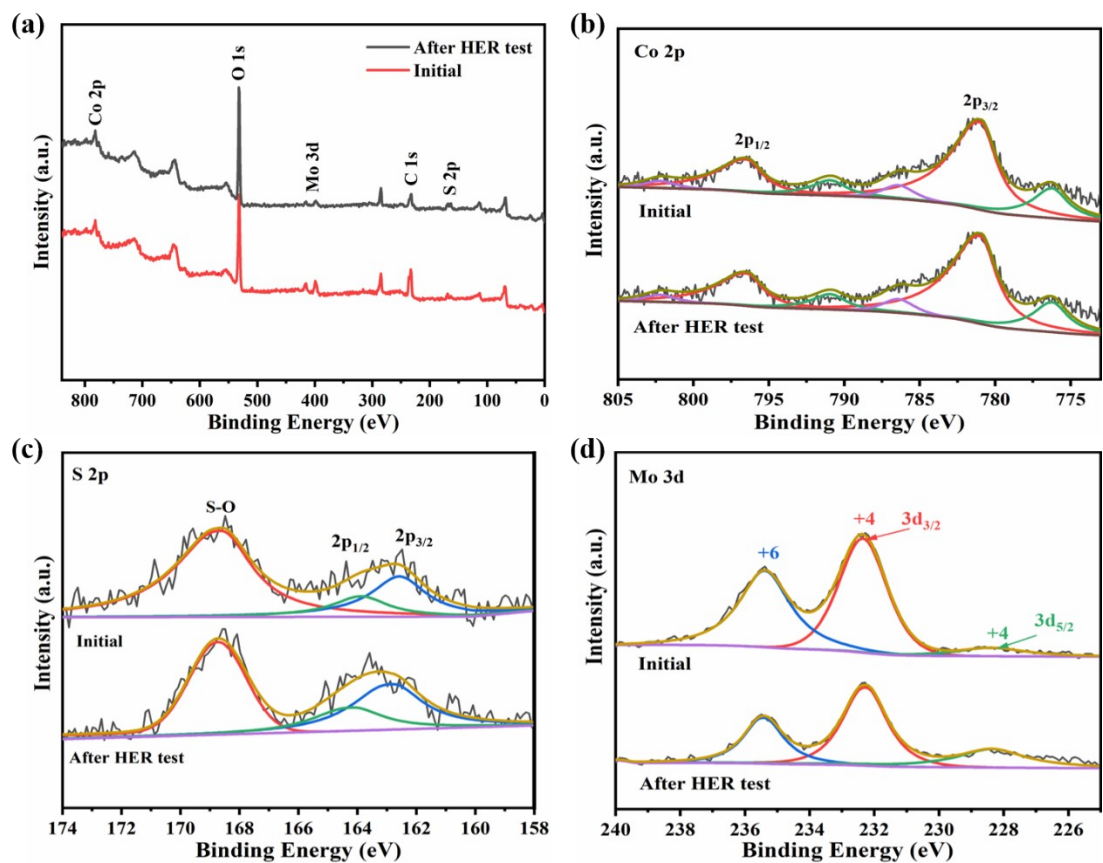

**Figure.S12** The high-resolution XPS spectra of (a) Co 2p, (b) S 2p, and (c) Mo 3d of the Mo-Co<sub>3</sub>S<sub>4</sub>-0.1/NF before and after HER test.

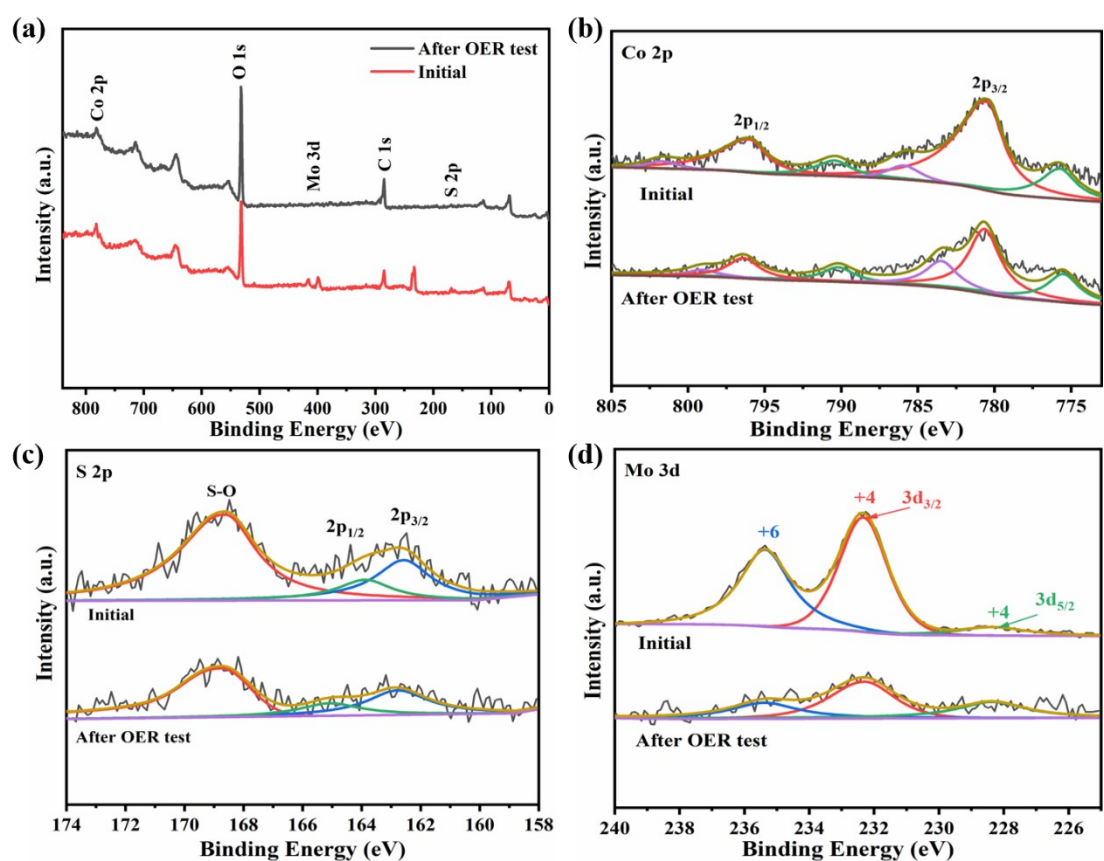

**Figure.S13** The high-resolution XPS spectra of (a) Co 2p, (b) S 2p, and (c) Mo 3d of the Mo-Co<sub>3</sub>S<sub>4</sub>-0.1/NF before and after OER test.

**Table S4.** Comparison of the HER activity over Mo-Co<sub>3</sub>S<sub>4</sub>-0.1/NF with several Co-based electrocatalysts in alkaline media.

| Samples                                                                            | HER<br>Overpotential/Current<br>density (mV/mA cm <sup>-2</sup> ) | ref       |
|------------------------------------------------------------------------------------|-------------------------------------------------------------------|-----------|
| Mo-Co <sub>3</sub> S <sub>4</sub> -0.1/NF                                          | 154/10                                                            | This work |
| Ni <sub>3</sub> S <sub>2</sub> /Co <sub>3</sub> S <sub>4</sub> /FeOOH@NF           | 158/10                                                            | 1         |
| CoMoP/Co <sub>3</sub> O <sub>4-x</sub> @NF                                         | 174/10                                                            | 2         |
| Co@Co-P@NPCNTs                                                                     | 160/10                                                            | 3         |
| Co <sub>9</sub> S <sub>8</sub> @Co <sub>9</sub> S <sub>8</sub> @MoS <sub>2-x</sub> | 173/10                                                            | 4         |
| Co-Ni <sub>3</sub> N                                                               | 194/10                                                            | 5         |
| CoNiMo/NPC                                                                         | 182/10                                                            | 6         |
| Ce-doped<br>CoMoP/MoP@C                                                            | 188/10                                                            | 7         |

## References:

1. Chen Fan, Xiaoping Shen, Jia Cheng, Leiming Lang, Guangxiang Liu, Zhenyuan Ji and Guoxing Zhu, *Colloids and Surfaces A: Physicochemical and Engineering Aspects*, 2021, **631**, 127689.
2. Yawen Hao, Gaohui Du, Yi Fan, Lina Jia, Di Han, Wenqi Zhao, Qingmei Su, Shukai Ding and Bingshe Xu, *ACS APPL MATER INTER*, 2021, **13**, 55263-55271.
3. Jiqing Jiao, Wenjuan Yang, Yuan Pan, Chao Zhang, Shoujie Liu, Chen Chen and Dingsheng Wang, *SMALL*, 2020, **16**, 2002124.
4. Jing Li, Guangshe Li, Jianghao Wang, Chenglin Xue, Xiangshuai Li, Shuo Wang, Bingqi Han, Min Yang and Liping Li, *INORG CHEM FRONT*, 2020, **7**, 191-197.
5. Changrong Zhu, An-Liang Wang, Wen Xiao, Dongliang Chao, Xiao Zhang, Nguyen Huy Tiep, Shi Chen, Jiani Kang, Xin Wang, Jun Ding, John Wang, Hua Zhang and Hong Jin Fan, *ADV MATER*, 2018, **30**, 1705516.
6. Xiaobing Yang, Weisen Yang, Xingping Fu, Jiapeng Hu and Juan Chen, *INT J HYDROGEN ENERG*, 2021, **46**, 18318-18325.
7. Tianyun Chen, Yingyan Fu, Wenhao Liao, Yaqi Zhang, Min Qian, Haojiang Dai, Xianfeng Tong and Qinghua Yang, *ENERG FUEL*, 2021, **35**, 14169-14176.
